# Supplementary material
Source: Research Square preprint supplement (doi:10.21203/rs.3.rs-8696719/v1)

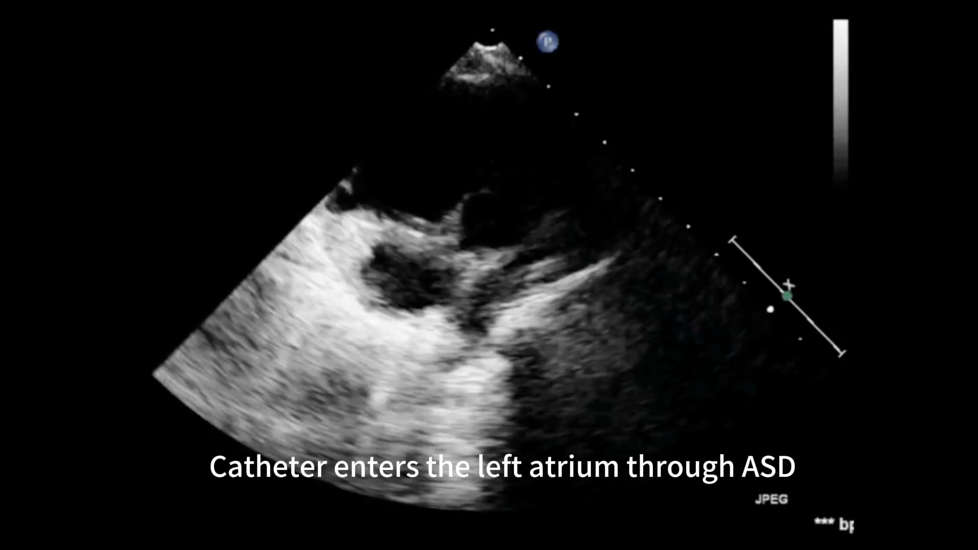


Video 1: UCG guided closure of ASD process

Supplement: Supplementary file 1 [file 968dfe8a8c4bc2f30b160cdd.docx]
